# Supplementary material for: TiO2/CdS porous hollow microspheres rapidly synthesized by salt-assistant aerosol decomposition method for excellent photocatalytic hydrogen evolution performance
Source: Royal Society of Chemistry journal article supplement (doi:10.1039/c5dt03637b), 2015-12-01
Supplement: c5dt03637b1.pdf [file c5dt03637b1.pdf]

## Supporting Information

### TiO<sub>2</sub>/CdS porous hollow microspheres rapidly synthesized by salt-assistant aerosol decomposition method for excellent photocatalytic hydrogen evolution performance

Yu Huang,<sup>a</sup> Jun Chen,<sup>a,b,\*</sup> Wei Zou,<sup>a</sup> Linxing Zhang,<sup>a</sup> Lei Hu,<sup>a</sup> Min He,<sup>c</sup> Lin Gu,<sup>c</sup> Jinxia Deng<sup>a</sup> and Xianran Xing<sup>a,\*</sup>

<sup>a</sup> Department of Physical Chemistry, University of Science and Technology Beijing, Beijing 100083, China.

<sup>b</sup> Beijing Key Laboratory of Special Melting and Preparation of High-End Metal Materials, Beijing 100083, China.

<sup>c</sup> Beijing Laboratory for Electron Microscopy, The Institute of Physics, Chinese Academy of Sciences, Beijing 100190, China.

#### Experimental section

##### Sample preparation

**Synthesis of TiO<sub>2</sub>/CdS solid spheres and dispersed particles.** TiO<sub>2</sub>/CdS solid spheres and dispersed particles were synthesized through a similar process. TiO<sub>2</sub>/CdS solid spheres were synthesized without adding NaCl and the other reaction conditions were the same with above synthesis of TiO<sub>2</sub>/CdS porous hollow spheres. TiO<sub>2</sub>/CdS dispersed particles were synthesized with adding excess content of NaCl, (Ti + Cd): Na = 1:5. The other reaction conditions were the same with above synthesis of TiO<sub>2</sub>/CdS porous hollow spheres.

**Synthesis of simple CdS and simple TiO<sub>2</sub>.** Simple CdS were synthesized without adding TiCl<sub>4</sub> and the other reaction conditions were the same with above synthesis of TiO<sub>2</sub>/CdS porous hollow spheres. Simple TiO<sub>2</sub> were synthesized without adding Cd(NO<sub>3</sub>)<sub>2</sub>·4H<sub>2</sub>O and the other reaction conditions were the same with above synthesis of TiO<sub>2</sub>/CdS porous hollow spheres.

**The physical mixture of CdS with TiO<sub>2</sub>.** According to ICP of TiO<sub>2</sub>/CdS porous hollow spheres, simple CdS and simple TiO<sub>2</sub> was directly mix together as a reference photocatalyst.

##### Characterization

The crystal structure of TiO<sub>2</sub>/CdS products was characterized by x-ray diffraction patterns (PANalytical X'Pert Powder PW3040/60, Holland) with Cu Kα1 radiation. The microstructure and morphology were carried out by a scanning electron microscope (Supra 55; Zeiss, Oberkochen, Germany), and high-resolution transmission electron microscope (HRTEM, JEM-2010; JEOL, Ltd., Tokyo, Japan). A spectrophotometer (Carry 5000 UV-Vis-NIR, America) was used to record the UV/Vis spectra of various samples. The specific surface area was measured by nitrogen adsorption/desorption at 77 K using Brunauer–Emmett–Teller (BET) method (Quadrachrome Si, Quantachrome, America). The chemical composition of TiO<sub>2</sub>/CdS porous hollow spheres was analyzed by inductively coupled plasma mass spectrometry (ICP-MS, Agilent 7500C).

### Photocatalytic H<sub>2</sub>-production activity

Before reaction, Ru was deposition on photocatalyst by photodeposition method under visible light: photocatalyst was added in aqueous solution containing 1.5 wt% of RuCl<sub>3</sub>·3H<sub>2</sub>O and lighted for 20 minutes. The photocatalytic hydrogen evolution reactions were performed in Labsolar II system (Beijing Perfectlight Technology Co. Ltd.). 300 mL Pyrex reaction vessel is connected to a closed gas circulation and an evacuation system at 15 °C. The evolved gases were measured by an online gas chromatograph (GC 7900, Techcomp) equipped with a molecular sieve (5 Å pore size) and Ar carrier gas. Under continuous stirring, 50 mg photocatalysts were dispersed into 100 mL deionized water containing 0.35 M Na<sub>2</sub>S·9H<sub>2</sub>O and 0.25 M K<sub>2</sub>SO<sub>3</sub> as sacrificial reagents by ultrasonication for 5 min (pH = 13.6). Prior to irradiation, the system was vacuumized for 30 min to remove the dissolved gases in water. A continuous magnetic stirrer was applied at the bottom of the reactor in order to keep the photocatalyst particles in suspension status during the whole experiment. A 300 W Xe lamp was used as a light source and 15 cm away from the reactor. A UV cut-off filter ( $\lambda \geq 420$  nm) was used to be the visible light source for the photocatalytic hydrogen evolution reaction. The illumination intensity was 201 mW/cm<sup>2</sup> on the solution surface and the illumination area was 38.5 cm<sup>2</sup>. The apparent quantum efficiency (AQE) was measured under the same conditions except that the 420 nm cut-off filter was changed to 420 nm band-pass filter (Figure S1). In the experiment, the irradiation intensity after the 420 nm band-pass filter was determined to be 9 mW/cm<sup>2</sup>. The reaction solution was irradiated for 3h to calculate AQE according to the following equation:

$$\text{AQE} = \frac{\text{The number of reacted electrons}}{\text{The number of incident photons}} \times 100\%$$
$$= \frac{\text{The number of evolved H}_2 \text{ molecular} \times 2}{\text{The number of incident photons}} \times 100\%$$

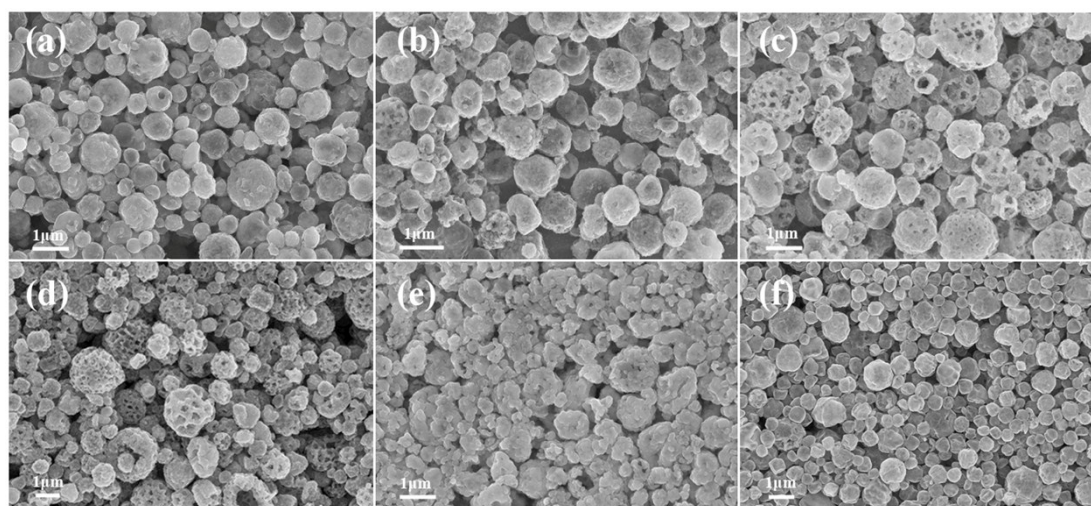

**Figure S1.** Microstructure of TiO<sub>2</sub>/CdS prepared by adding different NaCl salt content, simple CdS and simple TiO<sub>2</sub>: (a) (Ti + Cd): Na = 1:1; (b) (Ti + Cd): Na = 1:2; (c) (Ti + Cd): Na = 1:2.5; (d) (Ti + Cd): Na = 1:4; (e) simple CdS; (f) simple TiO<sub>2</sub>.

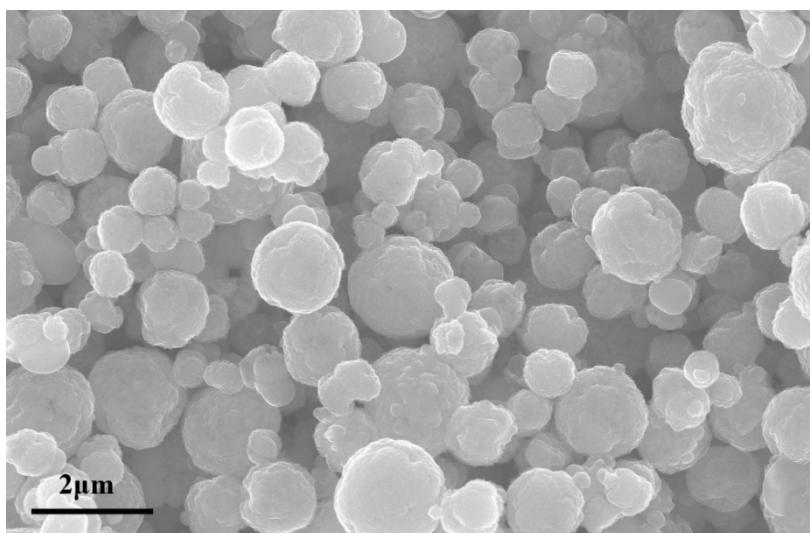

**Figure S2.** The SEM of TiO<sub>2</sub>/CdS porous hollow microspheres before washing with water.

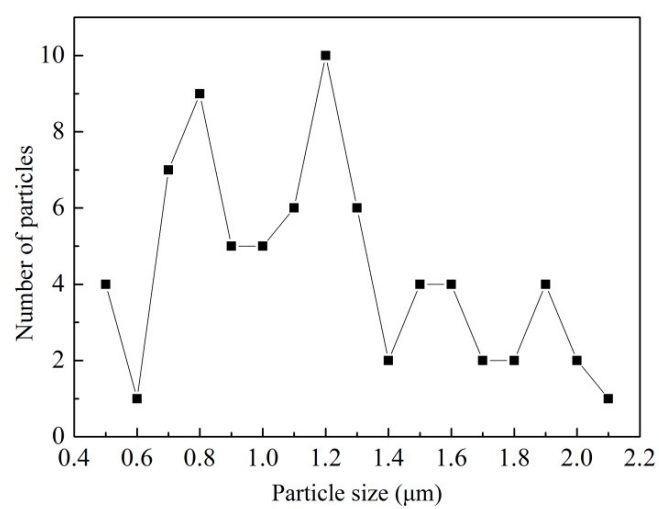

**Figure S3.** Particle size distribution of TiO<sub>2</sub>/CdS porous hollow microspheres.

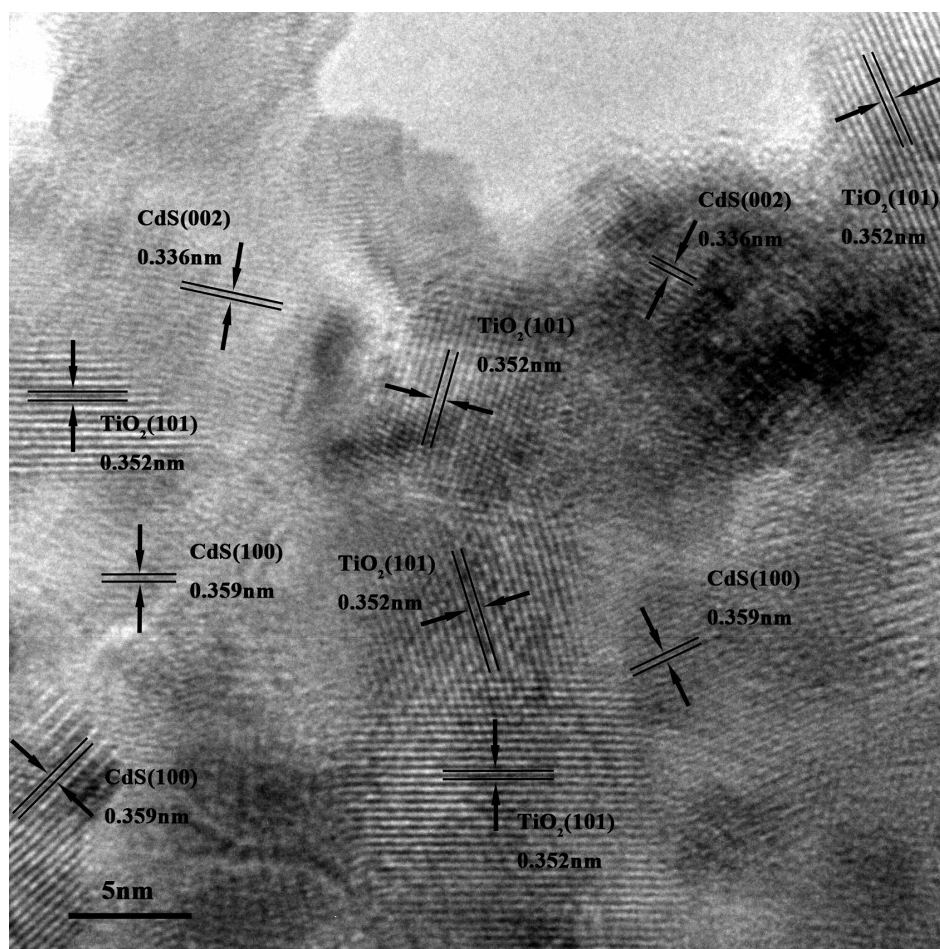

**Figure S4.** Higher scope HRTEM image of the TiO<sub>2</sub>/CdS porous hollow spheres.

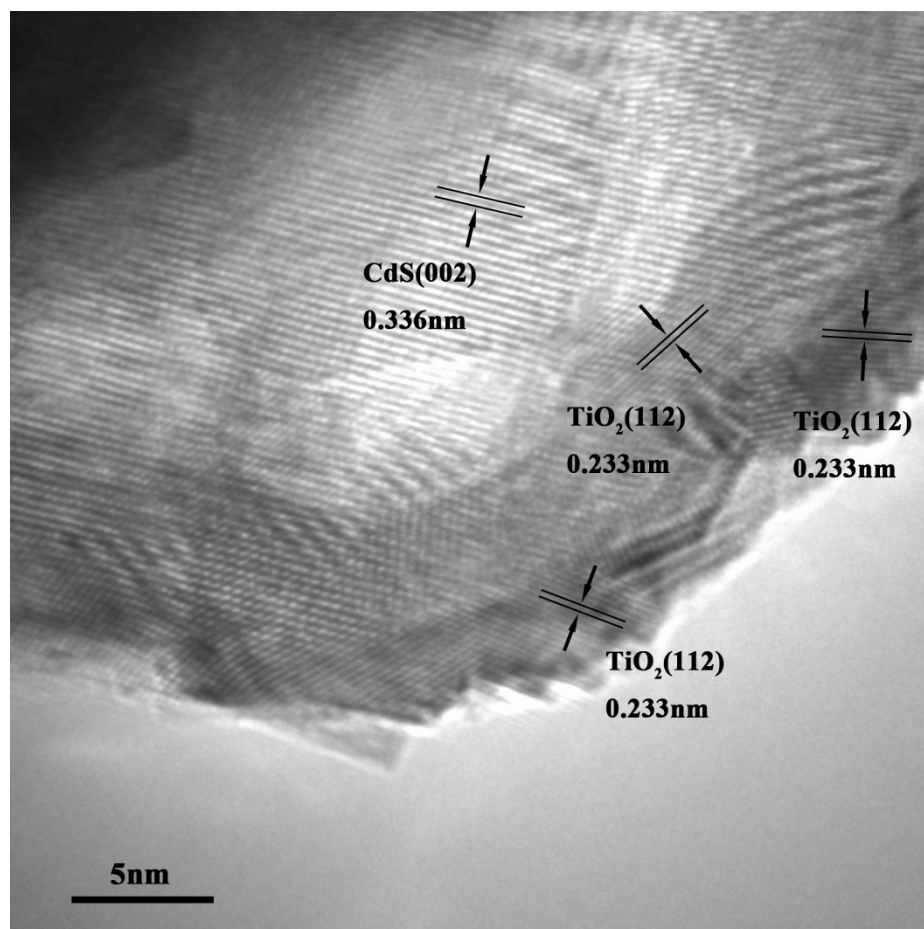

**Figure S5.** HRTEM image of the  $\text{TiO}_2/\text{CdS}$  dispersed particles.

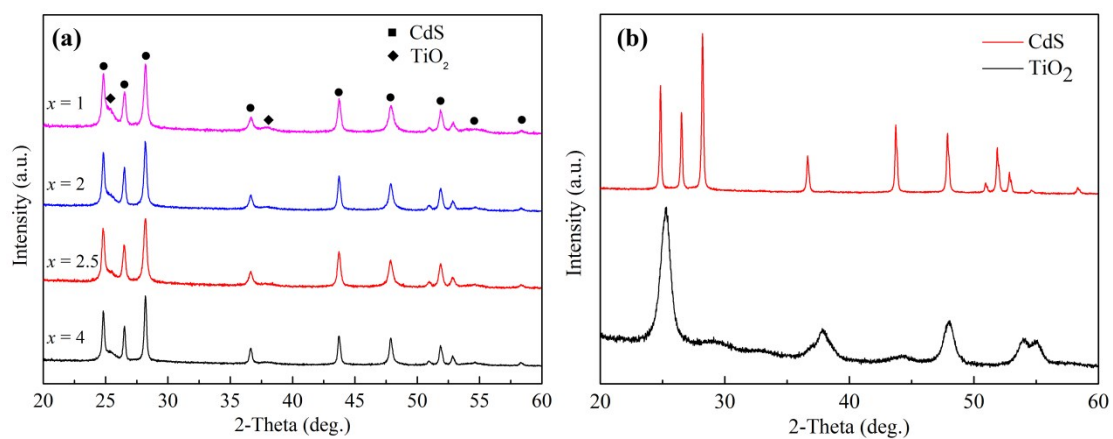

**Figure S6.** (a) XRD patterns of  $\text{TiO}_2/\text{CdS}$  prepared by adding different NaCl salt content into the precursor,  $(\text{Ti} + \text{Cd}): \text{Na} = x$ ; (b) XRD spectra of simple  $\text{TiO}_2$  and CdS.

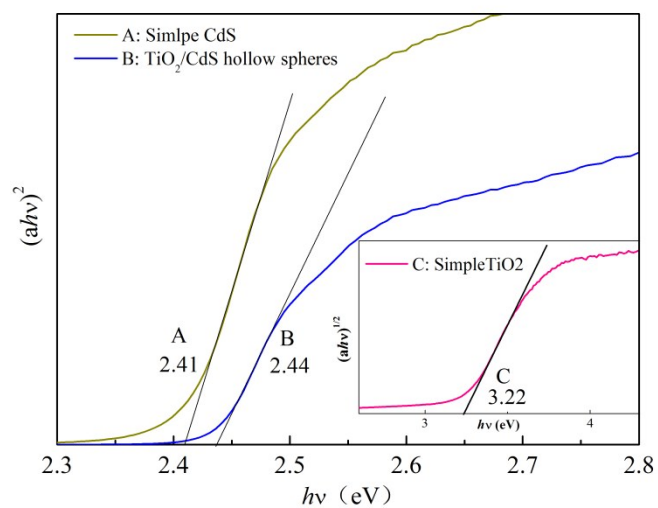

**Figure S7.** The plot of  $(\alpha h\nu)^2$  and  $(\alpha h\nu)^{1/2}$  (insets) versus  $h\nu$ .

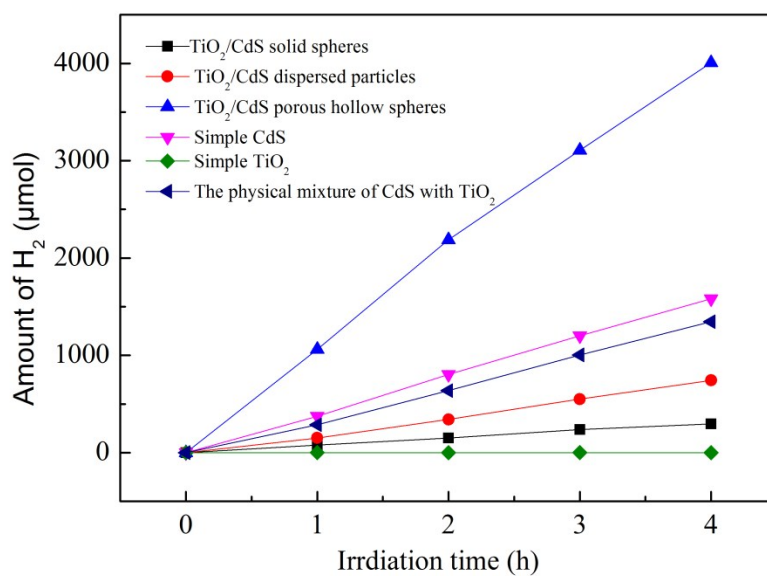

**Figure S8.** The time courses of hydrogen production in 4 hours.

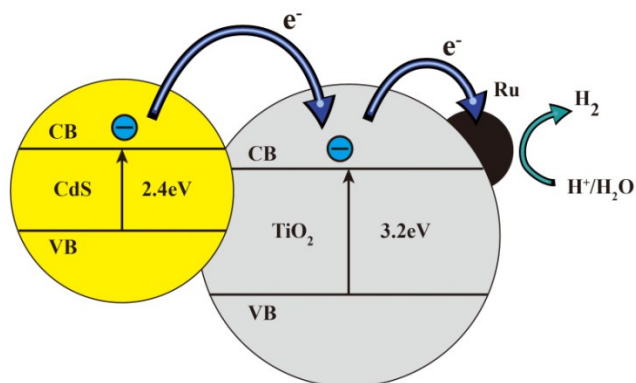

**Figure S9.** The illustration of electron transfer between CdS and TiO<sub>2</sub>.



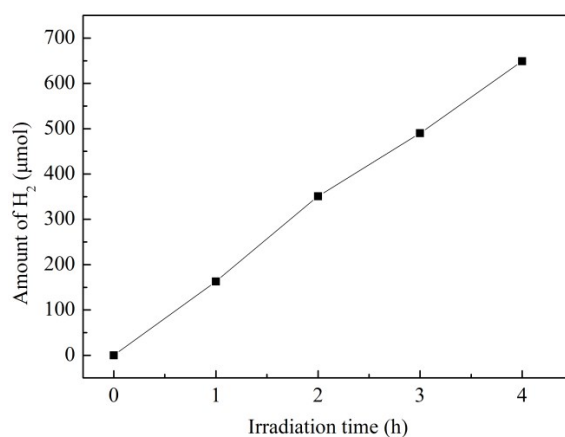

**Figure S10.** Photocatalytic hydrogen evolution amounts of TiO<sub>2</sub>/CdS porous hollow spheres in 4 hours without loaded Ru co-catalyst.

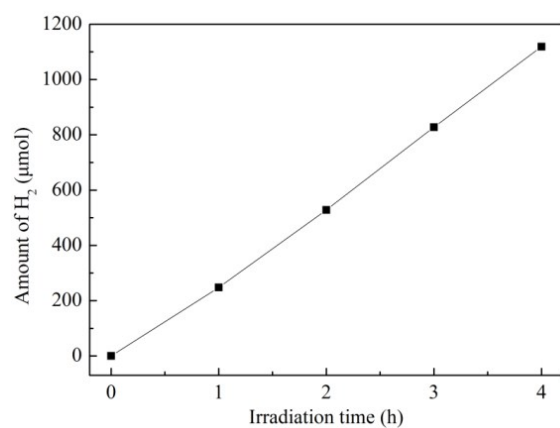

**Figure S11.** Photocatalytic hydrogen evolution amounts of TiO<sub>2</sub>/CdS porous hollow spheres in 4 hours after adding the 420 nm band-pass filter.

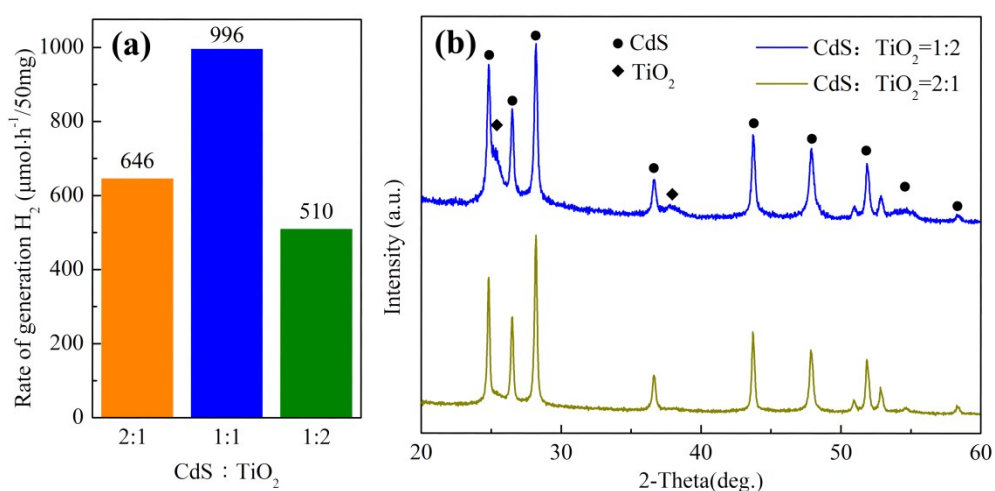

**Figure S12.** (a) Photocatalytic hydrogen evolution amounts of TiO<sub>2</sub>/CdS with different Ti: Cd mole ratio; (b) The XRD patterns of TiO<sub>2</sub>/CdS with different Ti: Cd mole ratio.

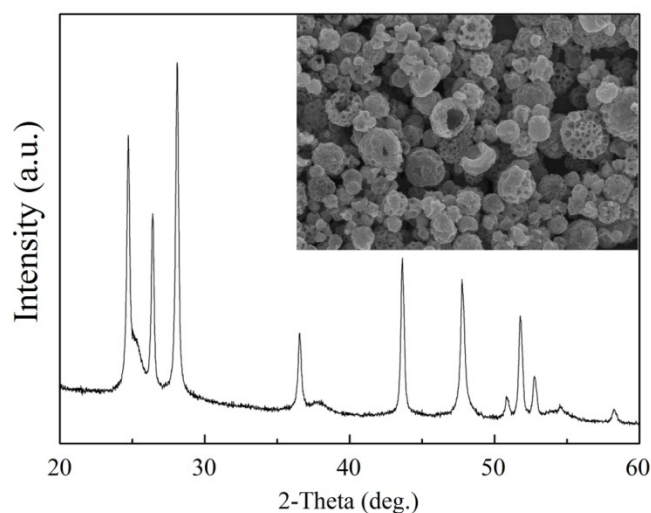

**Figure S13.** The XRD and SEM (insets) image of  $\text{TiO}_2/\text{CdS}$  porous hollow spheres with Ru-loaded after 20 hours photocatalytic hydrogen evolution reaction.

**Table S1.** Photocatalytic hydrogen evolution amounts of  $\text{TiO}_2/\text{CdS}$  porous hollow spheres synthesized with four times.

| 1                          | 2                          | 3                           | 4                           | Average                    |
|----------------------------|----------------------------|-----------------------------|-----------------------------|----------------------------|
| $980 \mu\text{mol h}^{-1}$ | $994 \mu\text{mol h}^{-1}$ | $1007 \mu\text{mol h}^{-1}$ | $1002 \mu\text{mol h}^{-1}$ | $996 \mu\text{mol h}^{-1}$ |

**Table S2.** The details for the comparison of the performance of the present photocatalyst  $\text{TiO}_2/\text{CdS}$  porous hollow microspheres with other materials.

| Photocatalyst                                                          | Co-catalyst | Light source                                    | Reactant Solution                                                                       | QY(420 nm) | H <sub>2</sub> evolution |                                      |
|------------------------------------------------------------------------|-------------|-------------------------------------------------|-----------------------------------------------------------------------------------------|------------|--------------------------|--------------------------------------|
|                                                                        |             |                                                 |                                                                                         |            | $\mu\text{mol h}^{-1}$   | $\mu\text{mol h}^{-1} \text{g}^{-1}$ |
| $\text{TiO}_2/\text{CdS}$ porous hollow spheres (0.05g) (Present work) | Ru(1.5 wt%) | 300 W Xe lamp ( $\lambda \geq 420 \text{ nm}$ ) | $\text{K}_2\text{SO}_3$ (0.25 M)<br>$\text{Na}_2\text{S}$ (0.35 M)<br>aqueous solution  | 12.8%      | 996                      | 19920                                |
| $\text{CdS}(\text{NW})/\text{TiO}_2$ (0.1g) [1]                        | Pt(1 wt%)   | 450 W Hg lamp ( $\lambda \geq 420 \text{ nm}$ ) | $\text{Na}_2\text{SO}_3$ (0.02 M)<br>$\text{Na}_2\text{S}$ (0.1 M)<br>aqueous solution  |            | 11                       | 110                                  |
| $\text{Pt}/\text{La}^{3+}/\text{TiO}_2\text{-CdS}$ (0.1g) [2]          | Pt(1 wt%)   | 400 W Hg lamp ( $\lambda \geq 420 \text{ nm}$ ) | $\text{Na}_2\text{SO}_3$ (0.02 M)<br>$\text{Na}_2\text{S}$ (0.1 M)<br>aqueous solution  | 10.8%      | 226                      | 2260                                 |
| $\text{CdS}/(\text{Pt-TiO}_2)$ (0.0125g) [3]                           | Pt          | 450 W Xe lamp ( $\lambda \geq 420 \text{ nm}$ ) | $\text{Na}_2\text{SO}_3$ (0.04 M)<br>$\text{Na}_2\text{S}$ (0.04 M)<br>aqueous solution | 4.5%       |                          | 6700                                 |



|                                                                                |                                         |                                              |                                                                                           |                  |      |       |
|--------------------------------------------------------------------------------|-----------------------------------------|----------------------------------------------|-------------------------------------------------------------------------------------------|------------------|------|-------|
| CdS(bulk)/TiO <sub>2</sub><br>(0.1g) [4]                                       | Pt(1 wt%)                               | 500 W Hg<br>lamp<br>( $\lambda \geq 420$ nm) | Na <sub>2</sub> SO <sub>3</sub> (0.02 M)<br>Na <sub>2</sub> S(0.1 M)<br>aqueous solution  |                  | 422  | 4220  |
| CdS/TiO <sub>2</sub><br>(0.1g) [5]                                             | Pt(2 wt%)                               | 500 W Hg<br>lamp<br>( $\lambda \geq 420$ nm) | Na <sub>2</sub> SO <sub>3</sub> (0.02 M)<br>Na <sub>2</sub> S(0.1 M)<br>aqueous solution  |                  | 560  | 5600  |
| CdS(bulk)/TiO <sub>2</sub><br>(0.1g) [6]                                       | Pt(0.75 wt%)                            | 350 W Hg<br>lamp<br>( $\lambda \geq 420$ nm) | Na <sub>2</sub> SO <sub>3</sub> (0.02 M)<br>Na <sub>2</sub> S(0.1 M)<br>aqueous solution  |                  | 640  | 6400  |
| CdS-Pt/TiO <sub>2</sub><br>(0.04g) [7]                                         | Pt                                      | 350 W Xe<br>lamp<br>( $\lambda \geq 420$ nm) | lactic acid aqueous<br>solutions                                                          | 13.9%            | 265  | 6400  |
| CdS/TiO <sub>2</sub> NT<br>(0.15g) [8]                                         | Pt(1 wt%)                               | 300 W Xe<br>lamp<br>( $\lambda \geq 420$ nm) | Na <sub>2</sub> SO <sub>3</sub> (0.35 M)<br>Na <sub>2</sub> S(0.25 M)<br>aqueous solution | 43.4%            | 402  | 2680  |
| CdS<br>(0.03g) [9]                                                             | Pt(10 wt%)                              | 500 W Xe<br>lamp<br>( $\lambda \geq 420$ nm) | Na <sub>2</sub> SO <sub>3</sub> (0.1 M)<br>Na <sub>2</sub> S(0.1 M)<br>aqueous solution   |                  | 138  | 4600  |
| CdSe/CdS/Pt [10]                                                               | Pt                                      | 450 W Xe<br>lamp<br>( $\lambda \geq 420$ nm) | Na <sub>2</sub> SO <sub>3</sub> (0.1 M)<br>Na <sub>2</sub> S(0.1 M)<br>aqueous solution   |                  |      | 434   |
| Au/CdS/ZnO<br>(0.1g) [11]                                                      | Au(1 wt%)                               | 450 W Hg<br>lamp<br>( $\lambda \geq 420$ nm) | Na <sub>2</sub> SO <sub>3</sub> (0.1 M)<br>Na <sub>2</sub> S(0.1 M)<br>aqueous solution   |                  | 61   | 610   |
| ZnO–CdS@Cd<br>(0.1g) [12]                                                      | Pt(3 wt%)                               | 300 W Xe<br>lamp<br>( $\lambda \geq 420$ nm) | Na <sub>2</sub> SO <sub>3</sub> (0.1 M)<br>Na <sub>2</sub> S(0.1 M)<br>aqueous solution   |                  | 1920 | 19200 |
| In <sub>2</sub> O <sub>3</sub> /Ta <sub>2</sub> O <sub>5</sub><br>(0.05g) [13] | Pt(1 wt%)                               | 300 W Xe<br>lamp<br>( $\lambda \geq 420$ nm) | 20 vol.% methanol<br>aqueous solution,                                                    |                  |      | 189   |
| TiO <sub>2</sub> /MoS <sub>2</sub> /graphen<br>e<br>(0.08g) [14]               | MoS <sub>2</sub> /graphene<br>(0.5 wt%) | 300 W Xe<br>lamp<br>(UV<br>irradiation)      | 25 vol.% ethanol<br>aqueous solution,                                                     | 9.7%(36<br>5 nm) | 165  | 2063  |
| TiO <sub>2</sub> @MoS <sub>2</sub> [15]                                        | without<br>cocatalyst                   | visible light<br>irradiation                 | Na <sub>2</sub> SO <sub>3</sub> (0.25 M)<br>Na <sub>2</sub> S(0.35 M)<br>aqueous solution |                  |      | 1600  |
| MoS <sub>2</sub> /CdS<br>(0.1g) [16]                                           | MoS <sub>2</sub> (0.2 wt%)              | 300 W Xe<br>lamp<br>( $\lambda \geq 420$ nm) | 10 vol.% lactic<br>aqueous solution                                                       |                  | 540  | 5400  |
| TiO <sub>2</sub> /AgGaS <sub>2</sub><br>(0.1g) [17]                            | Pt(1 wt%)                               | 450 W Hg<br>lamp<br>( $\lambda \geq 420$ nm) | Na <sub>2</sub> SO <sub>3</sub> (0.02 M)<br>Na <sub>2</sub> S(0.1 M)<br>aqueous solution  |                  | 420  | 4200  |

|                                                                          |             |                                              |                                                                                          |       |      |       |
|--------------------------------------------------------------------------|-------------|----------------------------------------------|------------------------------------------------------------------------------------------|-------|------|-------|
| SiC/CdS<br>(0.05) [18]                                                   | Pt(3 wt%)   | 300 W Xe<br>lamp<br>( $\lambda \geq 420$ nm) | Na <sub>2</sub> SO <sub>3</sub> (0.1 M)<br>Na <sub>2</sub> S(0.1 M)<br>aqueous solution  | 2.1%  | 273  | 5460  |
| (AgIn) <sub>0.22</sub> Zn <sub>1.56</sub> S <sub>2</sub><br>(0.3 g) [19] | Pt(3 wt%)   | 300 W Xe<br>lamp<br>( $\lambda \geq 420$ nm) | K <sub>2</sub> SO <sub>3</sub> (0.25 M)<br>Na <sub>2</sub> S(0.35 M)<br>aqueous solution | 20%   | 944  | 3147  |
| AgInZn <sub>7</sub> S <sub>9</sub><br>(0.3 g) [20]                       | Pt(3 wt%)   | 300 W Xe<br>lamp<br>( $\lambda \geq 420$ nm) | K <sub>2</sub> SO <sub>3</sub> (0.25 M)<br>Na <sub>2</sub> S(0.35 M)<br>aqueous solution | 15%   | 940  | 3133  |
| GuGa <sub>2</sub> In <sub>3</sub> S <sub>8</sub><br>(0.3 g) [21]         | Rh(1.5 wt%) | 300 W Xe<br>lamp<br>( $\lambda \geq 420$ nm) | K <sub>2</sub> SO <sub>3</sub> (0.5 M)<br>Na <sub>2</sub> S(0.2 M)<br>aqueous solution   | 15%   | 3200 | 10667 |
| (CuIn) <sub>0.09</sub> Zn <sub>1.82</sub> S <sub>2</sub><br>(0.3 g) [22] | Ru(0.5 wt%) | 300 W Xe<br>lamp<br>( $\lambda \geq 420$ nm) | K <sub>2</sub> SO <sub>3</sub> (0.25 M)<br>Na <sub>2</sub> S(0.35 M)<br>aqueous solution | 12.5% | 1227 | 4090  |

## References of Table S2.

- [1] Jang J. S., Kim H. G., Joshi U. A., et al., Fabrication of CdS nanowires decorated with TiO<sub>2</sub> nanoparticles for photocatalytic hydrogen production under visible light irradiation. *Int. J. Hydrogen. Energ.* 33 (2008) 5975-5980.
- [2] Peng S., Huang Y., Li Y., Rare earth doped TiO<sub>2</sub>-CdS and TiO<sub>2</sub>-CdS composites with improvement of photocatalytic hydrogen evolution under visible light irradiation. *Mat. Sci. Semicon. Proc.* 16 (2013) 62-69.
- [3] Park H., Choi W., Hoffmann M. R., Effects of the preparation method of the ternary CdS/TiO<sub>2</sub>/Pt hybrid photocatalysts on visible light-induced hydrogen production. *J. Mater. Chem.* 18 (2008) 2379-2385.
- [4] Jang J. S., Li W., Oh S. H., et al., Fabrication of CdS/TiO<sub>2</sub> nano-bulk composite photocatalysts for hydrogen production from aqueous H<sub>2</sub> S solution under visible light. *Chem. Phys. Lett.* 425 (2006) 278-282.
- [5] Jang J. S., Choi S. H., Kim H. G., et al., Location and state of Pt in platinized CdS/TiO<sub>2</sub> photocatalysts for hydrogen production from water under visible light. *J. Phys. Chem. C* 112 (2008) 17200-17205.
- [6] Jang J. S., Ji S. M., Bae S. W., et al., Optimization of CdS/TiO<sub>2</sub> nano-bulk composite photocatalysts for hydrogen production from Na<sub>2</sub>S/Na<sub>2</sub>SO<sub>3</sub> aqueous electrolyte solution under visible light( $\lambda \geq 420$ nm). *J. Photoch. Photobio. A* 118 (2007) 112-119.
- [7] Qi L, Yu J., Jaroniec M., Preparation and enhanced visible-light photocatalytic H<sub>2</sub>-production activity of CdS-sensitized Pt/TiO<sub>2</sub> nanosheets with exposed (001) facets. *Phys. Chem. Chem. Phys.* 13 (2011) 8915-8923.
- [8] Li C., Yuan J., Han B., et al., TiO<sub>2</sub> nanotubes incorporated with CdS for photocatalytic hydrogen production from splitting water under visible light irradiation. *Int. J. Hydrogen. Energ.* 35 (2010) 7073-7079.
- [9] Muruganandham M., Kusumoto Y., Okamoto C., et al., Mineralizer-assisted shape-controlled synthesis, characterization, and photocatalytic evaluation of CdS microcrystals. *J. Phys. Chem. C* 113 (2009) 19506-19517.
- [10] Tongying P., Vietmeyer F., Aleksik D., et al., Double heterojunction nanowire photocatalysts for hydrogen generation. *Nanoscale* 6 (2014) 4117-4124.
- [11] Yu Z. B., Xie Y. P., Liu G., et al., Self-assembled CdS/Au/ZnO heterostructure induced by surface polar charges for efficient photocatalytic hydrogen evolution. *J. Mater. Chem. A* 1 (2013) 2773-2776.
- [12] Wang X., Liu G., Wang L., et al., ZnO-CdS@Cd heterostructure for effective photocatalytic hydrogen generation. *Adv. Energy. Mater.* 2 (2012) 42-46.
- [13] Xu L., Guan J., Gao L., et al., Preparation of heterostructured mesoporous In<sub>2</sub>O<sub>3</sub>/Ta<sub>2</sub>O<sub>5</sub>

- 
- nanocomposites with enhanced photocatalytic activity for hydrogen evolution. *Cataly. Commun.* 12 (2011) 548-552.
- [14] Xiang Q., Yu J., Jaroniec M., Synergetic effect of MoS<sub>2</sub> and graphene as cocatalysts for enhanced photocatalytic H<sub>2</sub> production activity of TiO<sub>2</sub> nanoparticles. *J. Am. Chem. Soc.* 134 (2012) 6575-6578.
- [15] Zhou W., Yin Z., Du Y., et al., Synthesis of Few-Layer MoS<sub>2</sub> Nanosheet-Coated TiO<sub>2</sub> Nanobelt Heterostructures for Enhanced Photocatalytic Activities. *small* 9 (2013) 140-147.
- [16] Zong X., Yan H., Wu G., et al., Enhancement of photocatalytic H<sub>2</sub> evolution on CdS by loading MoS<sub>2</sub> as cocatalyst under visible light irradiation. *J. Am. Chem. Soc.* 130 (2008) 7176-7177.
- [17] Jang J. S., Hong S. J., Kim J. Y., et al., Heterojunction photocatalyst TiO<sub>2</sub>/AgGaS<sub>2</sub> for hydrogen production from water under visible light. *Chem. Phys. Lett.* 475 (2009) 78-81.
- [18] Peng Y., Guo Z., Yang J., et al., Enhanced photocatalytic H<sub>2</sub> evolution over micro-SiC by coupling with CdS under visible light irradiation. *J. Mater. Chem. A* 2 (2014) 6296-6300.
- [19] Tsuji I., Kato H., Kobayashi H., et al., Photocatalytic H<sub>2</sub> Evolution Reaction from Aqueous Solutions over Band Structure-Controlled (AgIn)<sub>x</sub> Zn<sub>2(1-x)</sub>S<sub>2</sub> Solid Solution Photocatalysts with Visible-Light Response and Their Surface Nanostructures. *J. Am. Chem. Soc.* 126 (2004) 13406-13413.
- [20] Kudo A., Tsuji I., Kato H., AgInZn<sub>7</sub>S<sub>9</sub> solid solution photocatalyst for H<sub>2</sub> evolution from aqueous solutions under visible light irradiation. *Chem. Commun.* 17 (2002) 1958-1959.
- [21] Kaga H., Saito K., Kudo A., Solar hydrogen production over novel metal sulfide photocatalysts of AGa<sub>2</sub>In<sub>3</sub>S<sub>8</sub> (A= Cu or Ag) with layered structures. *Chem. Commun.* 46 (2010) 3779-3781.
- [22] Tsuji I., Kato H., Kobayashi H., et al., Photocatalytic H<sub>2</sub> Evolution under Visible-Light Irradiation over Band-Structure-Controlled (CuIn)<sub>x</sub>Zn<sub>2(1-x)</sub>S<sub>2</sub> Solid Solutions. *J. Phys. Chem. B* 109 (2005) 7323-7329.
